# Supplementary material for: Higher Mast Cell Accumulation in Human Adipose Tissues Defines Clinically Favorable Obesity Sub-Phenotypes
Source: PubMed Central journal article supplement (PMC7349306; doi:10.3390/cells9061508), 2020-06-20
Supplement: cells-09-01508-s001.pdf [file cells-09-01508-s001.pdf]

## Supplemental Figures

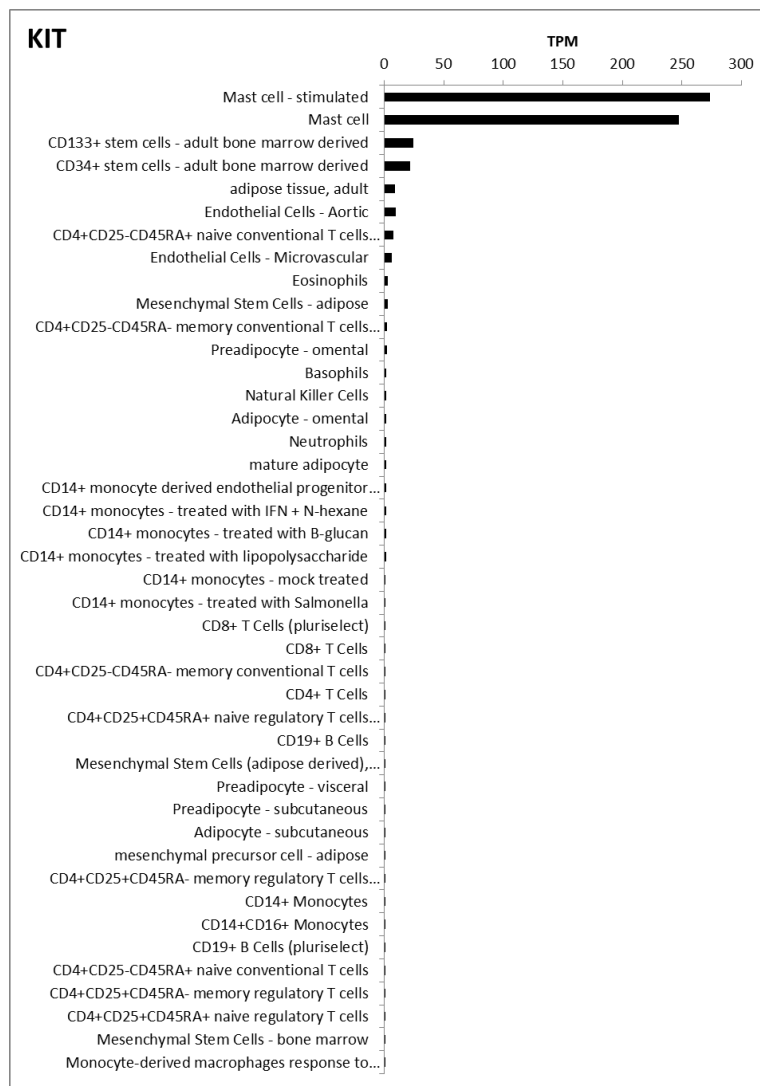

**Figure S1: The expression of KIT in cells that can be found in human AT.**

We mined a published human gene expression dataset of 556 tissues, cells, and cell lines (Ono H, *et al.*, RefEx, a reference gene expression dataset as a web tool for the functional analysis of genes. *Sci Data*. **2017**;4:170105). KIT was found to be most highly expressed in Mast Cells (MC) by at least 11-fold compared to the next highest KIT expressing cell population (hematopoietic stem cells). (TPM, tags per million).

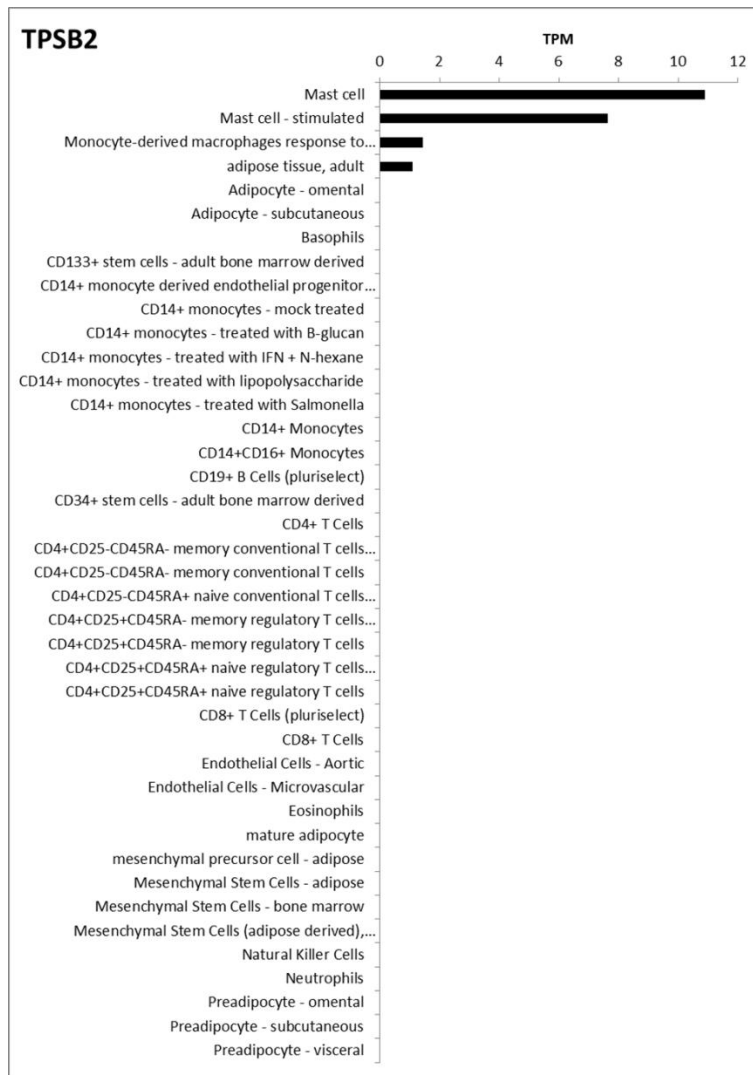

**Figure S2: The expression of TPSB2 in cells that can be found in human AT.**

We mined a published human gene expression dataset of 556 tissues, cells, and cell lines (Ono H, *et al.*, RefEx, a reference gene expression dataset as a web tool for the functional analysis of genes. *Sci Data*. **2017**;4:170105). TPSB2 was found to be ~7-fold more highly expressed than the next-highest expressing, influenza-stimulated monocyte-derived macrophages.

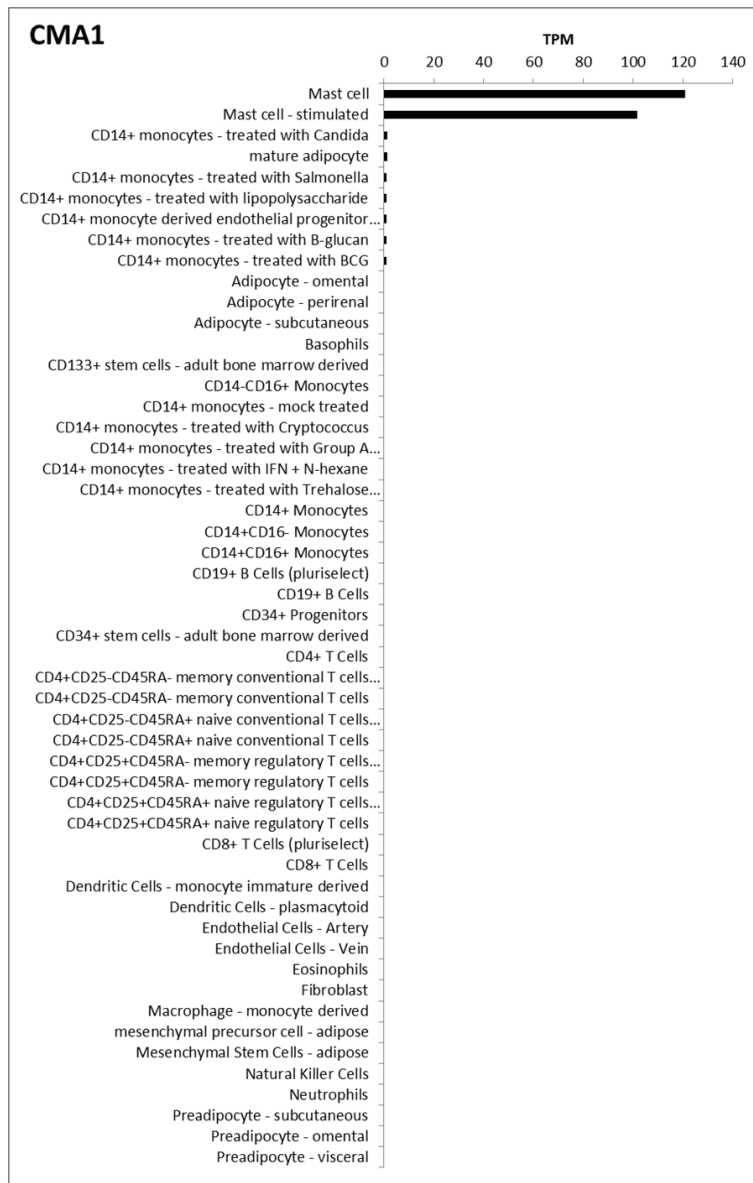

**Figure S3: The expression of CMA1 in cells that can be found in human AT.**

We mined a published human gene expression dataset of 556 tissues, cells, and cell lines (Ono H, *et al.*, RefEx, a reference gene expression dataset as a web tool for the functional analysis of genes. *Sci Data*. **2017**;4:170105). CMA1 was most specific to MC, being 86-fold more highly expressed than candida-treated monocytes

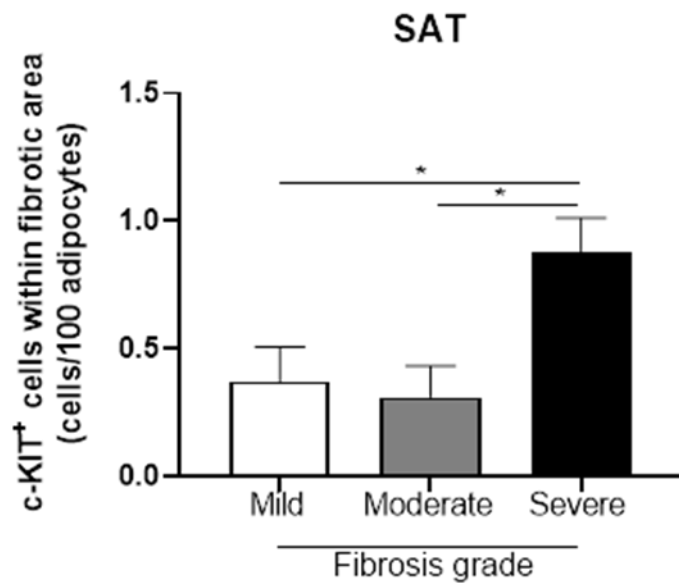

**Figure S4: SAT C-Kit<sup>+</sup> cells within fibrotic area and fibrosis grading.** Numbers of SAT C-Kit<sup>+</sup> cells in sections rated by clinical pathologists (co-authors YD and RSL) as exhibiting mild, moderate or severe degree of fibrosis (n=31). \*p<0.05

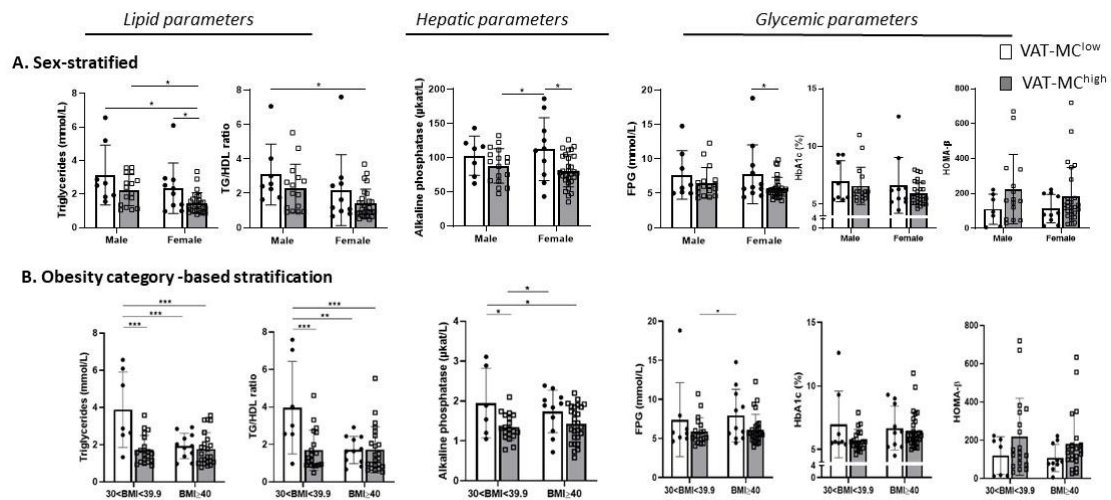

**Figure S5: Comparison of clinical parameters between participants with high versus low MC infiltration in VAT, stratified by sex or obesity category.** Participants from Beer-Sheva cohort (cohort 1) were stratified based on sex (**A**) or obesity category A-B ( $30 \leq \text{BMI} < 40$  kg/m<sup>2</sup>) or class C ( $\text{BMI} \geq 40$  kg/m<sup>2</sup>). Differences in triglycerides, TG/HDL ratio, Alkaline phosphatase, FPG, HbA1c and HOMA- $\beta$  between VAT- MC<sup>low</sup> versus VAT- MC<sup>high</sup>. Age-adjusted LSD post-hoc test was used to compare between groups. Values are expressed as mean  $\pm$  SD. \* $p < 0.05$ , \*\* $p < 0.01$ , \*\*\* $p < 0.001$ .

## **Supplemental Tables**

**Table S1: PCR probe ID**

|    | <b>Gene</b> | <b>Probe ID</b> |
|----|-------------|-----------------|
| 1. | KIT         | Hs00174029_m1   |
| 2. | TPSB2       | Hs02576518_gH   |
| 3. | CMA1        | Hs01095979_g1   |
| 4. | PGK1        | Hs00943178_g1   |
| 5. | PPIA        | Hs99999904_m1   |

**Table S2: Clinical characteristics of participants with obesity from the Be'er-Sheva and Leipzig cohorts, each also stratified by VAT-MC low/high based on expression of KIT**

|                                                       | Beer-Sheva (main cohort) |                        |                         | Leipzig-1 (validation cohort 1) |                        |                         | Leipzig 2 (validation cohort 2) |                        |                         |
|-------------------------------------------------------|--------------------------|------------------------|-------------------------|---------------------------------|------------------------|-------------------------|---------------------------------|------------------------|-------------------------|
|                                                       | total                    | VAT-KIT <sup>low</sup> | VAT-KIT <sup>high</sup> | total                           | VAT-KIT <sup>low</sup> | VAT-KIT <sup>high</sup> | total                           | VAT-KIT <sup>low</sup> | VAT-KIT <sup>high</sup> |
| N                                                     | 65                       | 32                     | 32                      | 32                              | 16                     | 16                      | 56                              | 24                     | 23                      |
| Age (year)                                            | 46.7±14.2                | 49.0±15.2              | 45.0±13.1               | 47.7±15.3                       | 54.0±16.0              | 41.4±12.1*              | 43.9±10.3                       | 47.4±10.1              | 40.6±9.3*               |
| Sex M/F                                               | 25/40                    | 13/19                  | 12/20                   | 9/23                            | 6/10                   | 3/13                    | 13/43                           | 7/17                   | 5/18                    |
| Weight (kg)                                           | 112.5±23.6               | 111.5±22.3             | 113.6±25.4              | 134.9±32.6                      | 122.3±28.7             | 147.6±32.1*             | 144.2±30.3                      | 139.8±28.5             | 148.1±28.6              |
| BMI (kg/m <sup>2</sup> )                              | 40.7±6.0                 | 39.6±5.4               | 41.7±6.6                | 47.9±11.2                       | 44.2±11.4              | 51.6±10.0               | 50.5±8.6                        | 47.9±7.4               | 52.5±8.3                |
| FPG (mmol/L)                                          | 6.5±2.7                  | 6.8±3.3                | 6.3±1.9                 | 6.7±2.2                         | 7.0±2.2                | 6.3±2.2                 | 6.6±1.7                         | 7.1±1.7                | 6.0±1.4*                |
| Insulin (nmol/L)                                      | 105.1±72.5               | 101.8±78.7             | 108.6±66.6              | 135.1±158.9                     | 89.1±64.4              | 168.0±197.6             | 206.1±163.4                     | 212.5±134.2            | 186.8±124.2             |
| HbA1c (mmol/mol)                                      | 45.9±16.7                | 45.8±18.5              | 45.2±15.3               | 44.3±9.1                        | 44.8±9.7               | 43.7±8.8                | 46.4±11.8                       | 47.2±10.3              | 46.8±13.4               |
| (%)                                                   | 6.3±1.6                  | 6.4±1.7                | 6.3±1.4                 | 6.2±0.8                         | 6.2±0.9                | 6.1±0.8                 | 6.4±1.1                         | 6.5±0.9                | 6.4±1.2                 |
| HOMA-IR                                               | 5.2±3.8                  | 5.0±3.8                | 5.3±3.9                 | 6.7±11.4                        | 3.8±2.7                | 8.8±14.6                | 8.9±7.4                         | 9.8±7.0                | 7.3±4.7                 |
| HOMA-β %                                              | 173.4±159.6              | 173.1±172.7            | 173.6±147.5             | 130.6±92.3                      | 93.5±82.3              | 157.2±92.6              | 219.3±166.8                     | 189.4±126.0            | 238.4±154.8             |
| Total cholesterol (mmol/L)                            | 4.8±1.1                  | 4.9±3.8                | 4.7±1.1                 | 4.7±1.1                         | 5.0±1.1                | 4.3±1.0                 | 5.3±1.1                         | 5.4±1.3                | 5.0±1.0                 |
| LDL-c (mmol/L)                                        | 2.8±0.9                  | 2.7±0.8                | 2.9±1.0                 | 3.2±1.3                         | 3.3±1.2                | 3.2±1.5                 | 3.3±1.0                         | 3.5±1.0                | 3.2±1.1                 |
| TG (mmol/L)                                           | 2.0±1.2                  | 2.3±1.4                | 1.8±0.8                 | 1.9±1.0                         | 2.0±1.1                | 1.7±1.0                 | 2.0±1.0                         | 2.3±1.1                | 1.6±0.7*                |
| HDL (mmol/L): male                                    | 1.0±0.2                  | 1.0±0.2                | 1.1±0.2                 | 1.1±0.2                         | 1.0±0.1                | 1.2±0.2                 | 1.1±0.3                         | 1.1±0.4                | 1.1±0.2                 |
| female                                                | 1.2±0.4                  | 1.3±0.3                | 1.2±0.4                 | 1.1±0.2                         | 1.0±0.1                | 1.2±0.2                 | 1.2±0.3                         | 1.3±0.3                | 1.1±0.3                 |
| TG/HDL ratio: male                                    | 2.6±1.5                  | 2.8±1.5                | 2.2±1.6                 | 1.8±1.2                         | 2.0±1.3                | 1.5±1.1                 | 2.6±1.9                         | 2.5±1.6                | 1.9±1.5                 |
| female                                                | 1.6±1.3                  | 1.7±1.6                | 1.5±0.9                 | 1.8±1.2                         | 2.0±1.3                | 1.5±1.1                 | 1.7±1.1                         | 2.0±1.4                | 1.4±0.7                 |
| CRP (nmol/L)                                          | 15.7±25.2                | 16.3±32.0              | 15.0±15.8               | 17.6±19.1                       | 23.4±25.2              | 12.1±8.5                | 59.4±65.3                       | 66.0±73.1              | 57.1±59.7               |
| AST (μkat/L)                                          | 0.5±0.4                  | 0.5±0.2                | 0.6±0.5                 | 0.7±0.7                         | 0.8±1.0                | 0.6±0.2                 | 0.6±0.3                         | 0.6±0.3                | 0.6±0.4                 |
| ALT (μkat/L)                                          | 0.6±0.4                  | 0.5±0.3                | 0.6±0.3                 | 0.7±0.5                         | 0.6±0.5                | 0.8±0.5                 | 0.7±0.4                         | 0.7±0.5                | 0.7±0.3                 |
| AP (μkat/L)                                           | 1.5±0.5                  | 1.5±0.6                | 1.5±0.4                 |                                 |                        |                         |                                 |                        |                         |
| Diastolic BP (mmHg)                                   | 81.0±17.2                | 83.1±23.4              | 79.3±10.8               |                                 |                        |                         |                                 |                        |                         |
| Systolic BP (mmHg)                                    | 138.5±16.1               | 140.4±19.5             | 137.2±13.4              |                                 |                        |                         |                                 |                        |                         |
| Visceral Median Adipocyte area (μm <sup>2</sup> )     | 4213.6±1323.8            | 4170.8±1372.9          | 4203.4±1344.5           |                                 |                        |                         |                                 |                        |                         |
| Subcutaneous Median Adipocyte area (μm <sup>2</sup> ) | 5720.9±1284.1 †          | 5882.4±930.0           | 5610.4±1551.0           |                                 |                        |                         |                                 |                        |                         |
| SAT-KIT                                               | 1.0±0.7                  | 0.8±0.5                | 1.2±0.8                 | 5.9±0.3                         | 5.9±0.4                | 5.9±0.2                 | 1.2±0.7                         | 1.0±0.6                | 1.4±0.7                 |
| SAT-TPSB2                                             | 1.2±0.8                  | 1.3±1.0                | 1.2±0.7                 | 6.3±0.5                         | 6.1±0.3                | 5.3±0.1                 | 1.2±0.9                         | 1.3±0.9                | 1.2±0.8                 |
| SAT-CMA1                                              | 2.1±1.0                  | 1.7±1.0                | 2.4±1.0                 | 5.3±0.1                         | 5.3±0.3                | 6.2±0.5                 | 1.3±0.8                         | 1.2±1.0                | 1.3±0.8                 |
| VAT fibrosis grade                                    | 1.8±0.7                  | 1.7±0.6                | 1.8±0.7                 |                                 |                        |                         |                                 |                        |                         |

VAT-MC accumulation was stratified based on the expression of VAT-KIT (below/above median). M, male; F, female; FPG, fasting plasma glucose; HOMA-IR, homeostatic model assessment of insulin resistance; HOMA-β, homeostatic model assessment of beta cells reserve; LDL-c, low density lipoprotein cholesterol; TG, triglycerides; HDL-c, high density lipoprotein cholesterol; CRP, c-reactive protein; AST, aspartate aminotransferase; ALT, alanine transaminase; AP, alkaline phosphatase; Values are mean ± standard deviation. \* p<0.05 different from VAT-KIT<sup>low</sup> by independent t-test. † p<0.05 compared visceral adipocyte area, by paired t-test.

**Table S3: Inter-correlation between SAT-MC gene expression and SAT-collagens**

|                | <b>KIT</b>                   | <b>TPSB2</b>                     | <b>CMA1</b>                  | <b>COLA3A1</b>                   | <b>COLA6A1</b>               |
|----------------|------------------------------|----------------------------------|------------------------------|----------------------------------|------------------------------|
| <b>COLA1A1</b> | n.s.                         | n.s.                             | n.s.                         | <b>0.544</b><br><b>&lt;0.001</b> | <b>0.321</b><br><b>0.050</b> |
| <b>COLA3A1</b> | n.s.                         | n.s.                             | n.s.                         |                                  | n.s.                         |
| <b>COLA6A1</b> | <b>0.356</b><br><b>0.028</b> | <b>0.564</b><br><b>&lt;0.001</b> | <b>0.342</b><br><b>0.036</b> |                                  |                              |

Inter-correlation between SAT-MC and collagens gene expression in the Beer-Sheva main cohort (n=39). n.s, not significant. Values are r and p value (upper and lower line, respectively) of Spearman's correlations.



**Table S4: Usage of medications in persons with VAT MC<sup>high</sup> and MC<sup>low</sup> among the entire main cohort**

| Entire cohort    |             |            |             |    |
|------------------|-------------|------------|-------------|----|
| Medications for: |             | Low (n=19) | High (n=46) |    |
| Diabetes:        | Insulin     | 5.3%       | 8.7%        | ns |
|                  | Non-insulin | 36.8%      | 28.3%       | ns |
| Statins          |             | 15.8%      | 17.4%       | ns |
| BP               |             | 21.1%      | 23.9%       | ns |
| Fibrate          |             | 5.3%       | 4.3%        | ns |
| Hypo-thyroid     |             | 10.5%      | 4.3%        | ns |
| Asthma           |             | 0.0%       | 8.7%        | ns |
| Aspirin          |             | 21.1%      | 8.9%        | ns |
| Reflux           |             | 5.3%       | 13.3%       | ns |

**Table S5: Diabetes duration and medication among persons with type 2 diabetes stratified to VAT MC<sup>high</sup> and MC<sup>low</sup>, main cohort.**

| Diabetes only              |             |           |             |    |
|----------------------------|-------------|-----------|-------------|----|
| Medications for:           |             | Low (n=9) | High (n=16) |    |
| Diabetes:                  | Insulin     | 11.1%     | 25.0%       | ns |
|                            | Non-insulin | 77.8%     | 81.3%       | ns |
| Statins                    |             | 22.2%     | 12.5%       | ns |
| BP                         |             | 33.3%     | 43.8%       | ns |
| Fibrate                    |             | 11.1%     | 12.5%       | ns |
| Hypo-thyroid               |             | 11.1%     | 0.0%        | ns |
| Asthma                     |             | 0.0%      | 6.3%        | ns |
| Aspirin                    |             | 44.4%     | 26.7%       | ns |
| Reflux                     |             | 11.1%     | 20.0%       | ns |
| Diabetes duration (months) |             | 55.2±66.1 | 80.2±71.8   | ns |

**Table S6: Association between SAT-MC genes expression and clinical parameters in the three cohorts.**

| Clinical Parameter | Beer-Sheva (main cohort) |         |          | Leipzig-1 (Validation cohort 1) |         |        | Leipzig-2 (Validation cohort 2) |        |        |        |
|--------------------|--------------------------|---------|----------|---------------------------------|---------|--------|---------------------------------|--------|--------|--------|
|                    | KIT                      | CMA1    | TPSB2    | KIT 1                           | KIT 2   | CMA1   | TPSB2                           | KIT    | CMA1   | TPSB2  |
| Age                | 0.054                    | -0.037  | 0.264    | -0.352*                         | -0.211  | -0.103 | 0.155                           | -0.241 | 0.137  | -0.112 |
| Weight             | -0.435**                 | -0.367* | -0.559** | 0.153                           | 0.063   | 0.197  | -0.186                          | 0.090  | 0.322* | 0.007  |
| BMI                | -0.109                   | 0.036   | -0.371*  | 0.190                           | 0.123   | 0.191  | -0.225                          | 0.228  | 0.192  | 0.047  |
| FPG                | 0.003                    | -0.013  | 0.152    | -0.275                          | -0.230  | -0.291 | 0.323                           | -0.209 | 0.005  | -0.082 |
| Insulin            | -0.213                   | -0.127  | -0.172   | -0.177                          | -0.178  | -0.161 | 0.172                           | 0.102  | 0.275  | -0.020 |
| HbA1c              | -0.018                   | -0.047  | 0.002    | -0.331                          | -0.138  | -0.310 | -0.045                          | -0.063 | -0.022 | -0.092 |
| HOMA-IR            | -0.173                   | -0.116  | -0.076   | -0.162                          | -0.190  | -0.225 | 0.209                           | 0.041  | 0.241  | -0.083 |
| HOMA-β %           | -0.068                   | 0.024   | -0.115   | -0.057                          | -0.043  | -0.009 | 0.131                           | 0.256  | 0.281* | 0.039  |
| Total cholesterol  | 0.153                    | 0.038   | 0.053    | 0.069                           | 0.054   | -0.429 | -0.039                          | 0.186  | -0.175 | 0.105  |
| LDL-c              | 0.196                    | 0.187   | -0.022   | 0.019                           | 0.119   | -0.393 | 0.142                           | 0.119  | 0.135  | 0.254  |
| TG                 | 0.017                    | 0.006   | 0.140    | -0.147                          | -0.208  | -0.340 | 0.016                           | -0.017 | -0.212 | 0.127  |
| HDL                | 0.105                    | -0.004  | 0.021    | 0.492*                          | 0.533*  | -0.279 | -0.163                          | -0.048 | -0.004 | -0.036 |
| TG/HDL ratio       | -0.068                   | -0.021  | 0.061    | -0.500                          | -0.518* | -0.114 | -0.096                          | -0.009 | -0.172 | 0.056  |
| CRP                | 0.120                    | 0.163   | -0.113   | 0.195                           | 0.234   | -0.003 | 0.214                           | -0.095 | -0.012 | -0.103 |
| AST                | -0.018                   | -0.006  | -0.013   | 0.081                           | 0.003   | 0.211  | -0.054                          | 0.144  | 0.065  | -0.018 |
| ALT                | -0.101                   | -0.087  | -0.236   | -0.095                          | -0.264  | -0.005 | -0.235                          | 0.087  | -0.058 | -0.086 |
| AP                 | -0.284                   | -0.300  | -0.124   |                                 |         |        |                                 |        |        |        |
| Diastolic BP       | -0.268                   | -0.184  | -0.239   |                                 |         |        |                                 |        |        |        |
| Systolic BP        | -0.258                   | -0.221  | -0.284   |                                 |         |        |                                 |        |        |        |

Spearman's correlation between MC genes expression and clinical parameters in three independent cohorts. Values are spearman's correlation coefficient. Red and green colors express negative and positive associations, respectively. \*p<0.05; \*\*p<0.01.
